# Supplementary material for: Aux/IAA11 Is Required for UV-AB Tolerance and Auxin Sensing in Arabidopsis thaliana
Source: MDPI journal article supplement (doi:10.3390/ijms232113386), 2022-11-02
Supplement: s1 [file s1]

**Table S1.** Mutants used in reverse genetic screen.

| TF family | AGI code  | Size (aa) | mutant          | mutation location | Comments | UV-AB susceptibility | DCMU susceptibility | MV susceptibility |
|-----------|-----------|-----------|-----------------|-------------------|----------|----------------------|---------------------|-------------------|
| AUX/IAA   | AT4G28640 | 302       | GK-685A08       | intron            | IAA11    | YES                  | YES                 | NO                |
| bHLH      | AT5G57150 | 226       | SALK_016841     | intron            | BHLH35   | NO                   | NO                  | NO                |
| bZIP      | AT4G37730 | 305       | GK-031D04       | exon              | bZIP7    | NO                   | NO                  | NO                |
| NAC       | AT1G33060 | 648       | SALK_031642     | exon              | NAC014   | NO                   | NO                  | NO                |
| WRKY      | AT2G03340 | 513       | SALK_119051     | exon              | WRKY3    | NO                   | NO                  | NO                |
| ZF        | AT2G29660 | 373       | SALK_119814     | exon              | ZF       | NO                   | NO                  | NO                |
| ZF        | AT3G47550 | 249       | SALK_090823     | exon              | F1P2.100 | YES                  | NO                  | NO                |
| ZF        | AT5G05660 | 880       | SALK_140301     | exon              | NFXL2    | YES                  | NO                  | NO                |
| ZF        | AT5G40710 | 272       | SALK_087836     | exon              | MNF13.27 | NO                   | NO                  | NO                |
| ZF        | AT5G40710 | 272       | WiscDsLox407C08 | exon              | MNF13.27 | NO                   | NO                  | NO                |

**Table S2.** List of primers used in this study.

| Gene name        | AGI code  | Forward primer sequence                                                      | Reverse primer sequence | Used for                                                   |
|------------------|-----------|------------------------------------------------------------------------------|-------------------------|------------------------------------------------------------|
| <i>AUX/IAA11</i> | AT4G28640 | TTCAGGGCCTTGTAATAATCAG                                                       | ACCACGGATACTACCGTTTTG   | SALKseq_033787 genotyping                                  |
| <i>AUX/IAA11</i> | AT4G28640 | ATGTTTTCATTATCCGGAGCC                                                        | ATTCCATGGCTGCAACTAGTG   | SALKseq_115462 genotyping                                  |
| <i>AUX/IAA11</i> | AT4G28640 | ATGTTTTCATTATCCGGAGCC                                                        | ATTCCATGGCTGCAACTAGTG   | SAILseq_567_H06 genotyping                                 |
| <i>AUX/IAA11</i> | AT4G28640 | ATGTTTTCATTATCCGGAGCC                                                        | CAGAGCTAGCGTAATTGCTGG   | GK-685A08 genotyping                                       |
| <i>AUX/IAA11</i> | AT4G28640 | GAGCTAGCGTAATTGCTGGG                                                         | TGTTCACTCTGTAAGTCCTT    | qPCR, intron flanking                                      |
| <i>AUX/IAA11</i> | AT4G28640 | CAGATGGGTCTTCCGGATTA                                                         | CATCTGAGCTTTACCAGTAG    | qPCR, <i>IAA11.1</i> splicing variant                      |
| <i>AUX/IAA11</i> | AT4G28640 | CAGATGGGTCTTCCGGATTA                                                         | CATCTTTACCAGTAGCCTCC    | qPCR, <i>IAA11.2</i> splicing variant                      |
| <i>AUX/IAA10</i> | AT1G04100 | GCTGATTCTTCTCCGGCTGC                                                         | CCGCCTTCCGTAGCTAAAGA    | qPCR                                                       |
| <i>AUX/IAA12</i> | AT1G04550 | TGAATCCGAAAGTTCAGGGC                                                         | CAAGTTTTCGTAAGACGAAT    | qPCR                                                       |
| <i>AUX/IAA13</i> | AT2G33310 | TCAAGTTGTTGGATGGCCTC                                                         | TTTCTTCTTACCAGTTCTT     | qPCR                                                       |
|                  |           | TGATCCATGTAGATTTCCCGGAC                                                      |                         | T-DNA binding, genotyping of Wisc mutants (WiscDsLoxHS_L4) |
|                  |           | ATGAAG                                                                       |                         |                                                            |
|                  |           | ATTTTGCCGATTTCCGGAAC                                                         |                         | T-DNA binding, genotyping of SALK mutants (LBb1_3)         |
|                  |           | TAGCATCTGAATTTCAATAC-<br>CAATCTCGATACAC<br>ATAATAACGCTGCG-<br>GACATCTACATTTT |                         | T-DNA binding, genotyping of SAIL mutants (LB3)            |
|                  |           | TGGACCAAATTACAATAATT-<br>GTGG                                                |                         | T-DNA binding, genotyping of GABI-kat mutants (o8474)      |
| <i>bHLH35</i>    | AT5G57150 | CTCTCCAGTGTGTGCCATCC                                                         | CTCACCTCTTCTCTGGCATG    | SALK_016841 genotyping                                     |
| <i>bZIP7</i>     | AT4G37730 | TTGCTCGTCTCATAGGTCCAC                                                        | AATTGTTTTGTGTCGTCGGAG   | GK-031D04 genotyping                                       |
| <i>AXX17</i>     | AT2G13960 | AGTTGTGAGGTCTTTGCTTGC                                                        | AGTCGGTTTTGAATAAACCGG   | SALK_009652 genotyping                                     |
| <i>NAC014</i>    | AT1G33060 | GCAAC-<br>CAATGCAAATTTAAATTC                                                 | AAACGTTGTTATGAAGTGGCG   | SALK_031642 genotyping                                     |
| <i>WRKY3</i>     | AT2G03340 | GAATTTCCGGCTCCAAAGTTTC                                                       | CAGCAAAATGGTTTGGATTTG   | SALK_119051 genotyping                                     |
| <i>ZF</i>        | AT2G29660 | GTCTGCTTCCAAGAAATGACG                                                        | TAAGATTCGATTGATCACCAG   | SALK_119814 genotyping                                     |
| <i>F1P2.100</i>  | AT3G47550 | GCATTGTTCGATAGCTTCTG                                                         | GGTCCAGATTTGAAAAAGC     | SALK_090823 genotyping                                     |
| <i>NFXL2</i>     | AT5G05660 | TAATACCGTGAAGACGGTTGG                                                        | TTCATCCAATCTGAAAGCCAC   | SALK_140301 genotyping                                     |
| <i>MNF13.27</i>  | AT5G40710 | GACGCAAGAAGAAATCTGCAG                                                        | GGGATTCTCACTTCCCCTTC    | SALK_087836 genotyping                                     |
| <i>MNF13.27</i>  | AT5G40710 | CACCATGGAAGGCGGTTCC                                                          | GGGATTCTCACTTCCCCTTC    | WiscDsLox407C08 genotyping                                 |
| <i>AUX/IAA11</i> | AT4G28640 | GGATCCTCATAATATCATCT                                                         | GGATCCTCATAATATCATCT    | IAA11.1 subcellular localization                           |
| <i>AUX/IAA11</i> | AT4G28640 | GGATCCTTACAAAAGAGAACA                                                        | GGATCCTTACAAAAGAGAACA   | IAA11.2 subcellular localization                           |

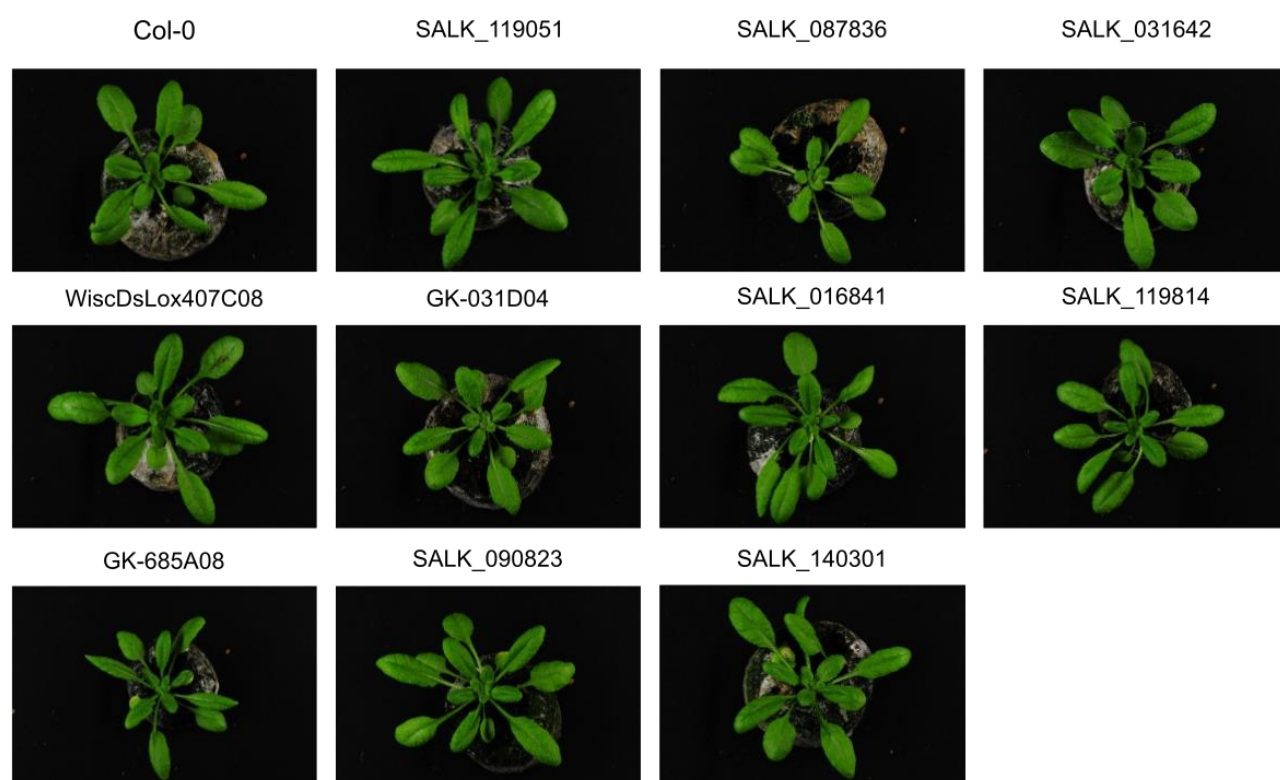

**Figure S1. Phenotypes of mutants used in reverse genetic screen.** Four week old rosettes of selected mutant lines did not exhibit abnormal phenotype when compared to the wild-type.

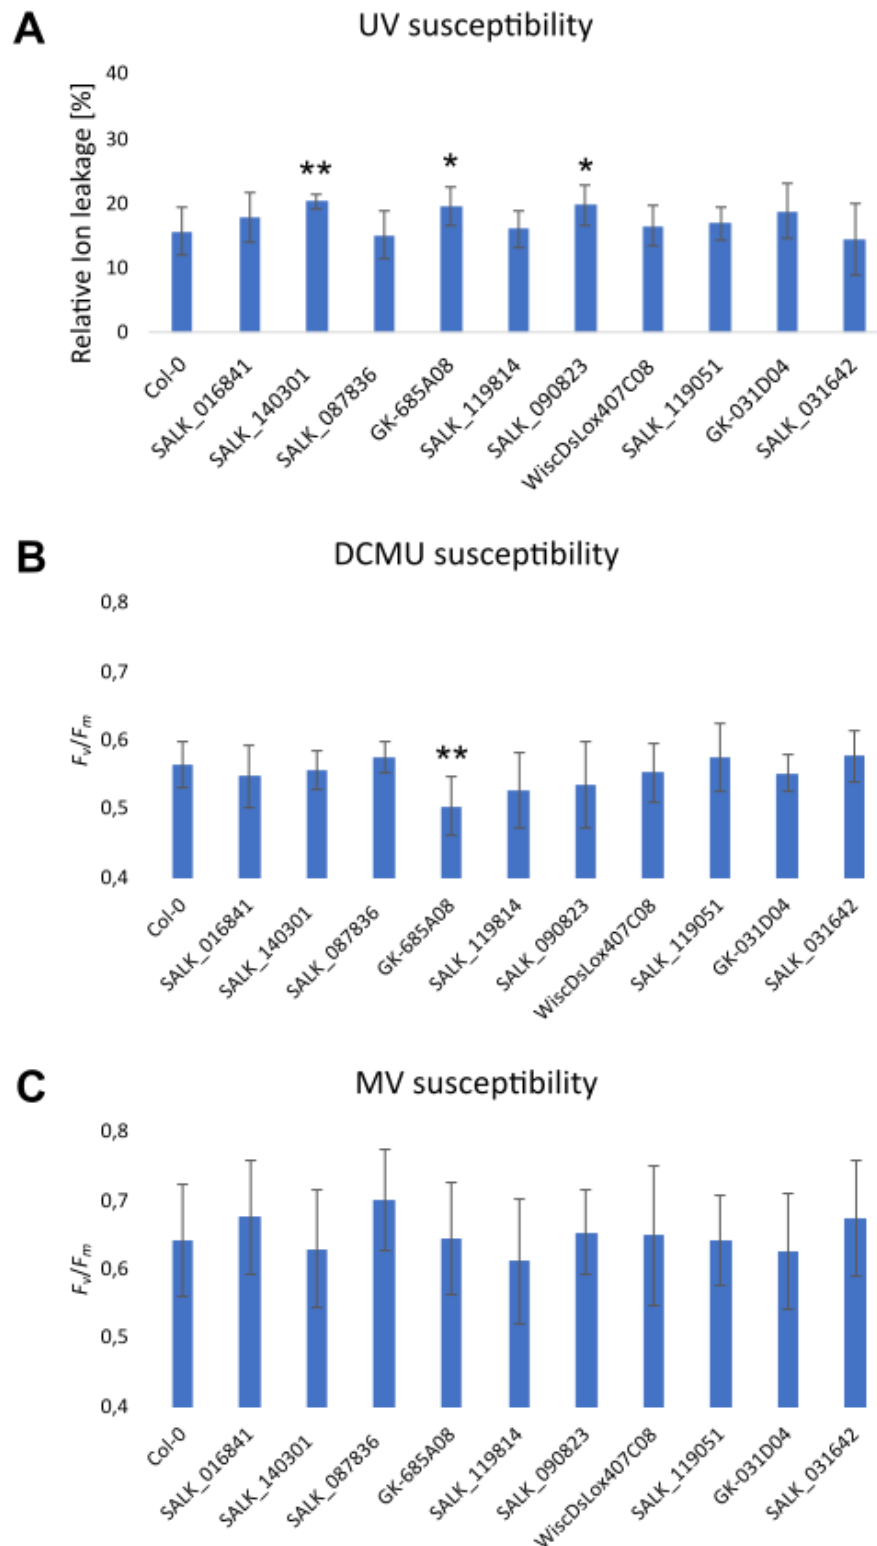

**Figure S2. Reverse genetic screen results.** (A) Relative ion leakage measured 72 hours after exposure to 1000 mJ cm<sup>-2</sup> of UV-AB, n = 8. (B) Maximum quantum yield of photosystem II ( $F_v/F_m$ ) after 3 hours of 60  $\mu$ M DCMU treatment, n  $\geq$  8. (C) Maximum quantum yield of photosystem II ( $F_v/F_m$ ) after 4 hours of 5  $\mu$ M MV treatment. n  $\geq$  8, t-test ( $p^* < 0,05$ ;  $p^{**} < 0,01$ ;  $p^{***} < 0,001$ ). Error bars represent standard deviation.

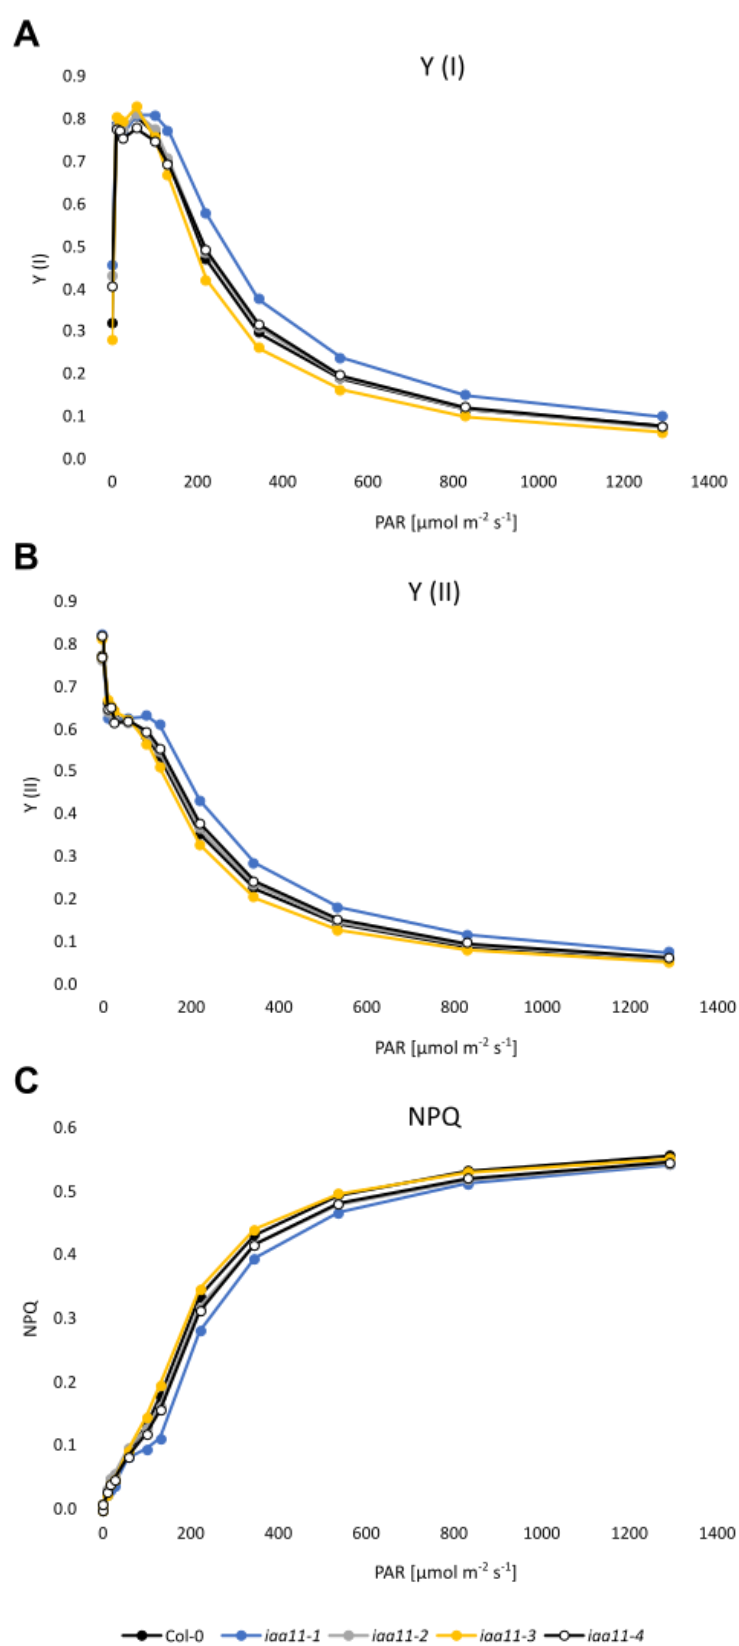

**Figure S3. Efficiency of photochemistry and heat dissipation of *Aux/IAA11* mutants.** (A) Yield of photosystem I. (B) Yield of photosystem II. (C) Non-photochemical quenching (NPQ)  $n = 10$ .

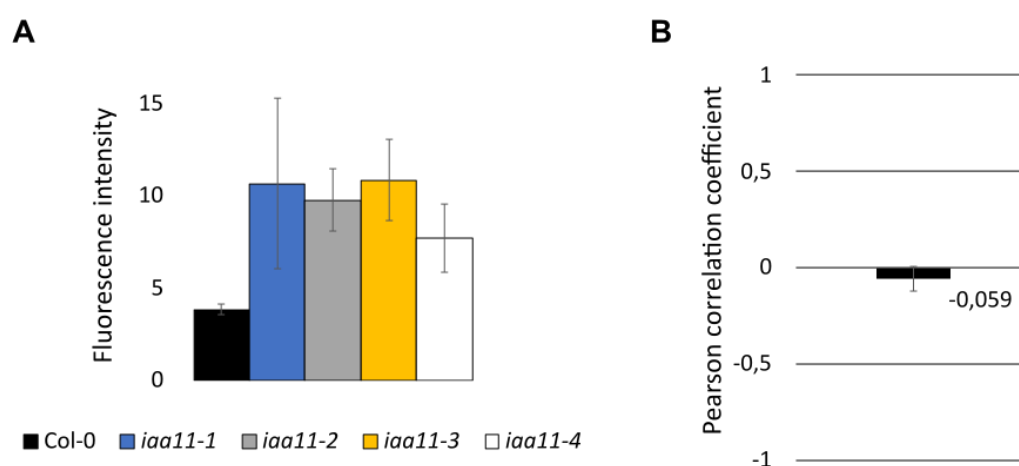

**Figure S4. Quantification of SOSG fluorescence intensity.** (A) Green channel intensity measured with ImageJ software,  $n \geq 3$ . (B) Pearson correlation coefficient between SOSG and Chlorophyll *a* fluorescence channels,  $n = 12$ . Error bars represent standard deviation.

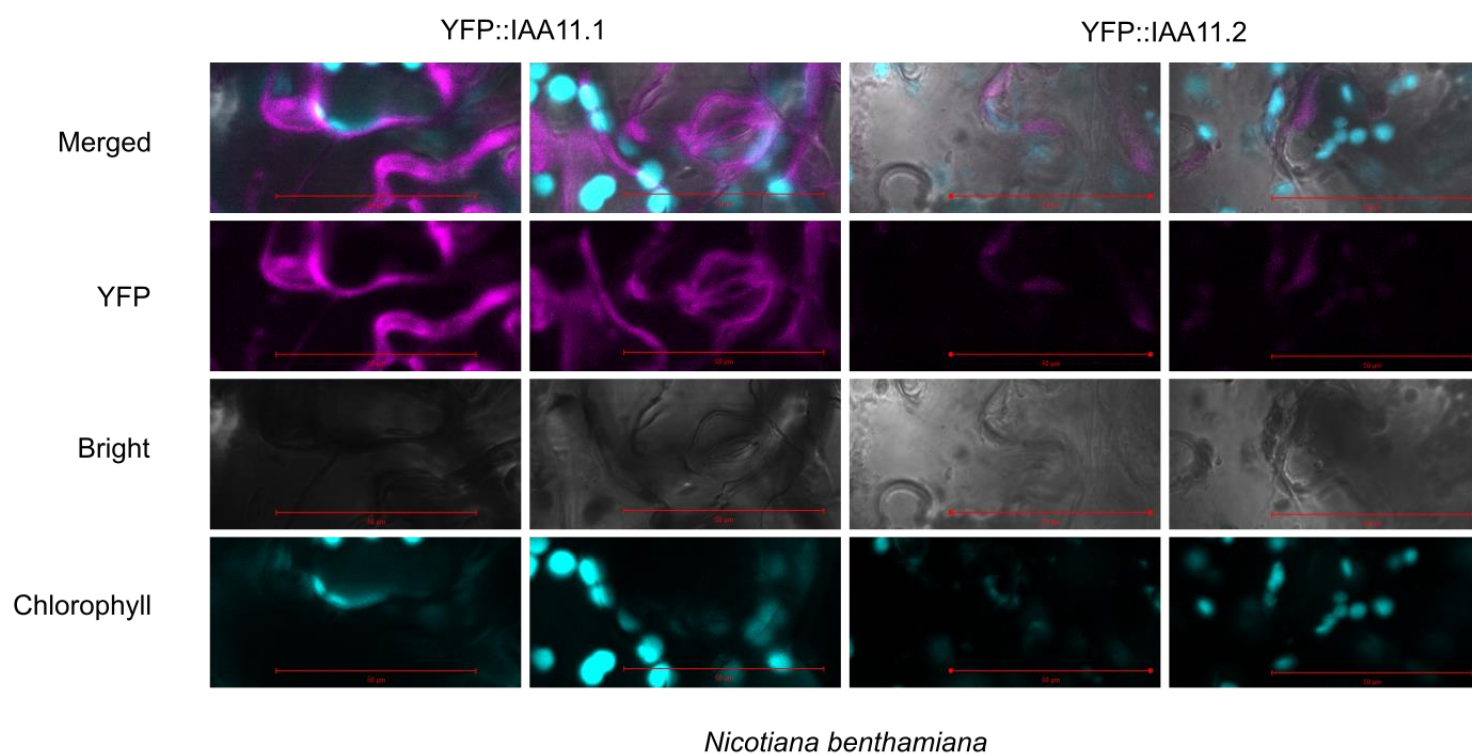

**Figure S5. Subcellular localization of IAA11 protein variants in *Nicotiana benthamiana*.** Transient expression of fusion proteins: YFP::IAA11.1 and YFP::IAA11.2 in *Nicotiana benthamiana* abaxial epidermis under 35S constitutive promoter. Pictures were taken 72 hours post agrobacterium infiltration using confocal microscopy. Magenta and cyan colors represent YFP and chlorophyll fluorescence respectively. Red scale bars represent 50  $\mu\text{m}$ .

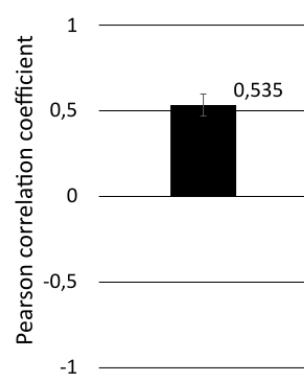

**Figure S6.** Pearson correlation coefficient between YFP and DAPI channels measured for signals obtained from IAA11.2 protein variant in *Allium cepa*,  $n = 4$ . Error bar represent standard deviation.
